# Supplementary material
Source: publisher site journal article supplement (https://www.dovepress.com/article/300269)
Supplement: Supplementary file 1 [file get_supplementary_file.php]

Supplementary S1. The AUC area for different makers for the colposcopy referral population (except for HSIL)

| **AUC** | | | | | |
| --- | --- | --- | --- | --- | --- |
| marker | AUC | SEM | p | 95% CI | |
| Low | High |
| p16 | .770 | .015 | .000 | .740 | .800 |
| Ki-67 | .736 | .018 | .000 | .701 | .771 |
| RELA | .902 | .012 | .000 | .879 | .925 |
| YAP1 | .877 | .013 | .000 | .852 | .902 |
| SMAD3 | .897 | .014 | .000 | .870 | .923 |
| p16, Ki-67 | .763 | .018 | .000 | .729 | .798 |
| p16, RELA | .788 | .017 | .000 | .754 | .822 |
| p16, YAP1 | .782 | .018 | .000 | .748 | .817 |
| p16, SMAD3 | .653 | .020 | .000 | .614 | .691 |
| p16, YAP1/RELA | .808 | .016 | .000 | .776 | .840 |
| p16, YAP1/SMAD3/RELA | .802 | .016 | .000 | .771 | .834 |

Supplementary S2. The AUC area for different makers for HPV16/18+ group.

| **AUC** | | | | | |
| --- | --- | --- | --- | --- | --- |
| marker | AUC | SEM | p | 95% CI | |
| Low | High |
| p16 | .736 | .021 | .000 | .694 | .778 |
| Ki-67 | .745 | .022 | .000 | .702 | .788 |
| RELA | .837 | .020 | .000 | .799 | .876 |
| YAP1 | .768 | .023 | .000 | .724 | .813 |
| SMAD3 | .649 | .025 | .000 | .599 | .699 |
| p16, Ki-67 | .776 | .022 | .000 | .733 | .820 |
| p16, RELA | .801 | .022 | .000 | .758 | .844 |
| p16, YAP1 | .755 | .024 | .000 | .709 | .801 |
| p16, SMAD3 | .644 | .026 | .000 | .593 | .694 |
| p16, YAP1/RELA | .802 | .021 | .000 | .760 | .844 |
| p16, YAP1/SMAD3/RELA | .796 | .021 | .000 | .754 | .837 |

Supplementary S3. The AUC area for different makers for other HPV+ combined with ASCUS group.

| **AUC** | | | | | |
| --- | --- | --- | --- | --- | --- |
| marker | AUC | SEM | p | 95% CI | |
| Low | High |
| p16 | .791 | .031 | .000 | .731 | .851 |
| Ki-67 | .705 | .038 | .000 | .631 | .778 |
| RELA | .645 | .039 | .000 | .568 | .721 |
| YAP1 | .759 | .035 | .000 | .691 | .828 |
| SMAD3 | .596 | .040 | .013 | .517 | .676 |
| p16, Ki-67 | .711 | .039 | .000 | .634 | .788 |
| p16, RELA | .706 | .039 | .000 | .629 | .782 |
| p16, YAP1 | .798 | .036 | .000 | .728 | .869 |
| p16, SMAD3 | .608 | .041 | .005 | .527 | .690 |
| p16, YAP1/RELA | .847 | .029 | .000 | .790 | .903 |
| p16, YAP1/SMAD3/RELA | .813 | .030 | .000 | .755 | .872 |
|  | | | | | |
|  | | | | | |

Supplementary S4. The AUC area for different makers for LSIL group.

| **AUC** | | | | | |
| --- | --- | --- | --- | --- | --- |
| marker | AUC | SEM | p | 95% CI | |
| Low | High |
| p16 | .798 | .026 | .000 | .747 | .848 |
| Ki-67 | .721 | .034 | .000 | .655 | .787 |
| RELA | .875 | .025 | .000 | .825 | .925 |
| YAP1 | .751 | .031 | .000 | .691 | .811 |
| SMAD3 | .669 | .035 | .000 | .600 | .739 |
| p16, Ki-67 | .737 | .034 | .000 | .670 | .804 |
| p16, RELA | .851 | .030 | .000 | .793 | .909 |
| p16, YAP1 | .795 | .031 | .000 | .733 | .856 |
| p16, SMAD3 | .697 | .036 | .000 | .626 | .767 |
| p16, YAP1/RELA | .801 | .031 | .000 | .741 | .861 |
| p16, YAP1/SMAD3/RELA | .784 | .031 | .000 | .724 | .844 |

Supplementary S5. Flowchart of the follow-up.


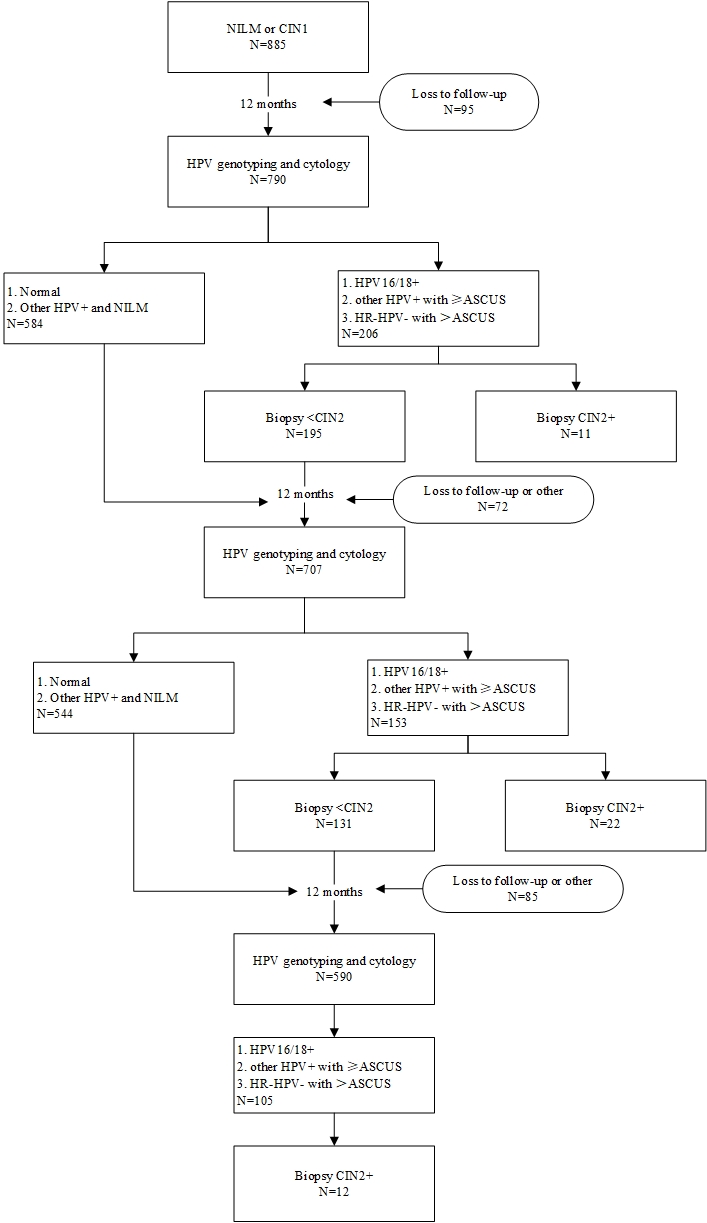


Supplementary S6. The AUC area for different makers for CIN2+ predicting during follow-up

| **AUC** | | | | | |
| --- | --- | --- | --- | --- | --- |
| marker | AUC | SEM | p | 95% CI | |
| Low | High |
| p16 | .789 | .033 | .000 | .725 | .854 |
| Ki-67 | .661 | .047 | .000 | .569 | .752 |
| RELA | .821 | .038 | .000 | .747 | .896 |
| YAP1 | .618 | .047 | .008 | .526 | .710 |
| SMAD3 | .624 | .048 | .005 | .531 | .717 |
| p16, Ki-67 | .621 | .048 | .006 | .526 | .715 |
| p16, RELA | .839 | .041 | .000 | .759 | .919 |
| p16, YAP1 | .632 | .049 | .003 | .536 | .729 |
| p16, SMAD3 | .643 | .049 | .001 | .547 | .740 |
| p16, YAP1/RELA | .878 | .034 | .000 | .812 | .944 |
| p16, YAP1/SMAD3/RELA | .862 | .034 | .000 | .796 | .928 |
|  | | | | | |
|  | | | | | |
